# Supplementary material for: Synthesis of Samarium OxysulfateSm2O2SO4 in the High-Temperature Oxidation Reaction and Its Structural, Thermal and Luminescent Properties
Source: MDPI journal article supplement (doi:10.3390/molecules25061330), 2020-03-14
Supplement: s1 [file s1]

Article

# Synthesis of Samarium Oxysulfate $\text{Sm}_2\text{O}_2\text{SO}_4$ in the High-Temperature Oxidation Reaction and Its Structural, Thermal and Luminescent Properties

Yu.G. Denisenko <sup>1</sup>, E.I. Sal'nikova <sup>2,3</sup>, S.A. Basova <sup>2</sup>, M.S. Molokeev <sup>4,5,6</sup>, A.S. Krylov <sup>7</sup>,  
A.S. Aleksandrovsky <sup>8,9</sup>, A.S. Oreshonkov <sup>7,10</sup>, V.V. Atuchin <sup>11,12,13,\*</sup>, S.S. Volkova <sup>14</sup>,  
N.A. Khritokhin <sup>2</sup> and O.V. Andreev <sup>2,15</sup>

<sup>1</sup> Department of General and Special Chemistry, Industrial University of Tyumen, Tyumen 625000, Russia; yu.g.denisenko@gmail.com

<sup>2</sup> Institute of Chemistry, Tyumen State University, Tyumen 625003, Russia; elenasalnikova213@gmail.com (E.I.S.); basovasofia@yandex.ru (S.A.B.); kna@utmn.ru (N.A.K.); o.v.andreev@utmn.ru (O.V.A.)

<sup>3</sup> Department of General Chemistry, Northern Trans-Ural Agricultural University, Tyumen 625003, Russia

<sup>4</sup> Laboratory of Crystal Physics, Kirensky Institute of Physics, Federal Research Center KSC SB RAS, Krasnoyarsk 660036, Russia; msmolokeev@mail.ru

<sup>5</sup> School of Engineering Physics and Radioelectronics, Siberian Federal University, Krasnoyarsk 660041, Russia

<sup>6</sup> Department of Physics, Far Eastern State Transport University, Khabarovsk 680021, Russia

<sup>7</sup> Laboratory of Molecular Spectroscopy, Kirensky Institute of Physics Federal Research Center KSC SB RAS, Krasnoyarsk 660036, Russia; shusy@iph.krasn.ru (A.S.K.); oreshonkov@iph.krasn.ru (A.S.O.)

<sup>8</sup> Laboratory of Coherent Optics, Kirensky Institute of Physics Federal Research Center KSC SB RAS, Krasnoyarsk 660036, Russia; aleksandrovsky@kirensky.ru

<sup>9</sup> Institute of Nanotechnology, Spectroscopy and Quantum Chemistry, Siberian Federal University, Krasnoyarsk 660041, Russia

<sup>10</sup> School of Engineering and Construction, Siberian Federal University, Krasnoyarsk 660041, Russia

<sup>11</sup> Laboratory of Optical Materials and Structures, Institute of Semiconductor Physics, SB RAS, Novosibirsk 630090, Russia

<sup>12</sup> Laboratory of Semiconductor and Dielectric Materials, Novosibirsk State University, Novosibirsk 630090, Russia

<sup>13</sup> Research and Development Department, Kemerovo State University, Kemerovo 650000, Russia

<sup>14</sup> Research Resource Center "Natural Resource Management and Physico-Chemical Research", Tyumen State University, Tyumen 625003, Russia; svolkova2008@mail.ru

<sup>15</sup> Laboratory of the chemistry of rare earth compounds, Institute of Solid State Chemistry, UB RAS, Ekaterinburg 620137, Russia

\* Correspondence: atuchin@isp.nsc.ru

Received: 5 February 2020; Accepted: 10 March 2020; Published: 14 March 2020

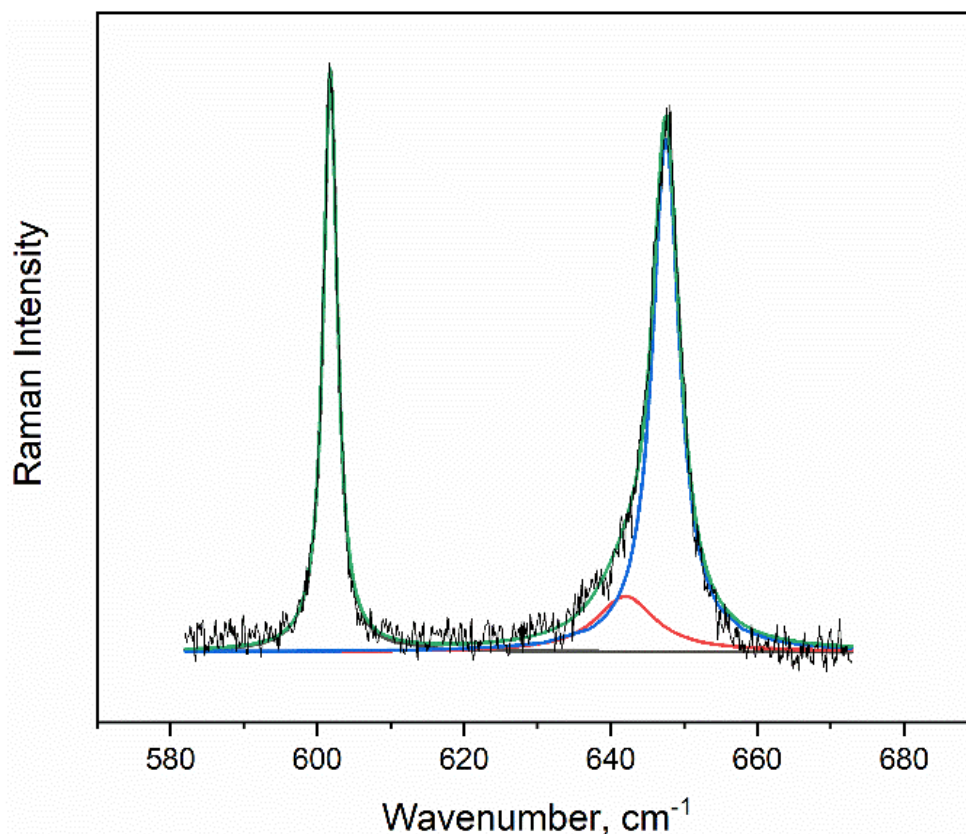

**Figure S1.** Decomposition of the  $\text{Sm}_2\text{O}_2\text{SO}_4$  Raman spectrum in the range of  $\nu_4$  vibrations of  $[\text{SO}_4]^{2-}$  ions.

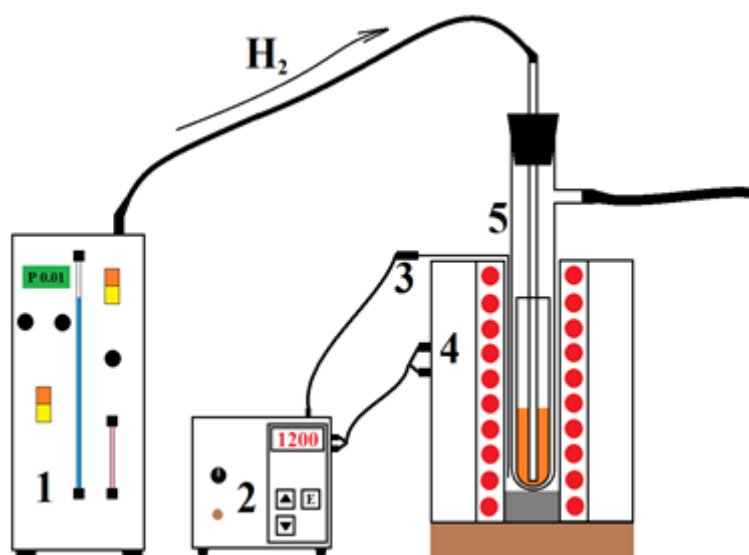

**Figure S2.** Installation scheme of processing substances in a stream of hydrogen: 1 - a hydrogen generator; 2 - power control unit of electricity supplied to the furnace; 3 - Thermocouple; 4 - electric heating furnace; 5 - reactor with the processed substance
