# Supplementary material for: Synthesis of Samarium OxysulfateSm2O2SO4 in the High-Temperature Oxidation Reaction and Its Structural, Thermal and Luminescent Properties
Source: Molecules. 2020 Mar 14;25(6):1330. doi: 10.3390/molecules25061330 (PMC7144115; doi:10.3390/molecules25061330)
Supplement: Supplementary file 1 [file molecules-25-01330-s001.zip › Sm2O2SO4.cif]

data_a

_diffrn_radiation_probe  x-ray
_diffrn_measurement_device_type
;
D8 ADVANCE Bruker
;
_pd_spec_mount_mode reflection
_pd_meas_scan_method step
 loop_
_diffrn_radiation_wavelength
_diffrn_radiation_wavelength_wt
 1.5406    1.0000
 1.5443    0.5000
_diffrn_radiation_type
;
 Cu K\a~1~~2~
;
_diffrn_radiation_monochromator none

_chemical_name_mineral
;
;

_symmetry_space_group_name_H-M C2/c

_symmetry_cell_setting monoclinic
_symmetry_space_group_name_hall 
;
-C 2yc
;

_cell_length_a  13.74416(16)
_cell_length_b  4.201780(38)
_cell_length_c  8.167114(82)
_cell_angle_alpha 90
_cell_angle_beta  107.2244(12)
_cell_angle_gamma 90
_cell_volume 450.4980(86)
_chemical_formula_moiety
;
O6 S Sm2
;
_chemical_formula_sum
;
O6 S Sm2
;

_chemical_formula_weight  428.78
_cell_formula_units_Z 4
_exptl_crystal_density_diffrn  6.32202(12)

_exptl_absorpt_coefficient_mu  197.82

_cell_measurement_temperature  300
_diffrn_ambient_temperature  300


_pd_char_colour
;
colourless
;

_cell_measurement_reflns_used 104
_cell_measurement_theta_min 5
_cell_measurement_theta_max 70
_pd_proc_number_of_points 6500
_pd_meas_2theta_range_min 10
_pd_meas_2theta_range_max 140
_pd_meas_2theta_range_inc 0.02

_pd_proc_ls_profile_function PearsonVII
_pd_proc_ls_pref_orient_corr
;
Anisotropic model of PO. Spherical harmonics 2 ordrer.
 Jarvinen (1993). Application of symmetrized harmonics expansion to correction
of the preferred orientation effect. - J. Appl. Cryst. 26 p525-531.
;

_refine_ls_shift/su_max  0.01000
_refine_ls_R_I_factor 1.70
_pd_proc_ls_prof_wR_factor 6.157
_pd_proc_ls_prof_R_factor 4.515
_pd_proc_ls_prof_wR_expected 2.780
_refine_ls_goodness_of_fit_all 2.215
loop_
_symmetry_equiv_pos_as_xyz
	'x, y, z'
	'-x, -y, -z'
	'-x, y, -z+1/2'
	'x, -y, z+1/2'
	'-x+1/2, -y+1/2, -z'
	'-x+1/2, y+1/2, -z+1/2'
	'x+1/2, -y+1/2, z+1/2'
	'x+1/2, y+1/2, z'
loop_
_atom_site_label
_atom_site_type_symbol
_atom_site_fract_x
_atom_site_fract_y
_atom_site_fract_z
_atom_site_occupancy
_atom_site_B_iso_or_equiv
Sm1 Sm 0.169302(33) 0.50148(36) 0.08499(26) 1 0.446(22)
S1 S 0 0.0339(15) 0.25 1 1.634(80)
O3 O 0.09042(39) 0.8717(12) 0.2840(19) 1 0.754(72)
O2 O 0.99957(84) 0.2711(12) 0.09846(76) 1 0.754(72)
O1 O 0.24736(33) 0.0224(24) 0.1196(25) 1 0.754(72)

loop_
 _geom_bond_atom_site_label_1
 _geom_bond_atom_site_label_2
 _geom_bond_distance
 _geom_bond_site_symmetry_2
Sm1 O3 2.6983(91)  .
Sm1 O3 2.846(13) 4_564
Sm1 O2 2.5580(92) 1_455
Sm1 O2 2.5467(82) 2_665
Sm1 O1 2.2591(94)  .
Sm1 O1 2.4170(95) 1_565
Sm1 O1 2.291(14) 5_555
Sm1 O1 2.346(19) 6_555
S1 O3 1.3717(50) 1_545
S1 O2 1.5877(71) 1_455

loop_
 _geom_angle_atom_site_label_1
 _geom_angle_atom_site_label_2
 _geom_angle_atom_site_label_3
 _geom_angle
 _geom_angle_site_symmetry_1
 _geom_angle_site_symmetry_3
O3 Sm1 O3 136.1(10) 1_555 4_564
